# Supplementary material for: Deficiency of miRNA-149-3p shaped gut microbiota and enhanced dextran sulfate sodium-induced colitis
Source: PubMed Central journal article supplement — Mol Ther Nucleic Acids. 2022 Sep 24;30:208–25. doi: 10.1016/j.omtn.2022.09.018 (PMC9556934; doi:10.1016/j.omtn.2022.09.018), 2022-09-24
Supplement: mmc1.pdf [file mmc1.pdf]

OMTN, Volume 30

## **Supplemental information**

### **Deficiency of miRNA-149-3p shaped gut microbiota and enhanced dextran sulfate sodium-induced colitis**

**Qingqing Feng, Yuanqiang Li, Hongli Zhang, Ziwei Wang, Xiaobo Nie, Denglin Yao, Lu Han, Wei-Dong Chen, and Yan-Dong Wang**

**Table S1. The information of antibodies**

| <b>Antibodies</b>                  | <b>Source</b>                | <b>Identifier</b> | <b>Dilution</b> | <b>Origin</b>     |
|------------------------------------|------------------------------|-------------------|-----------------|-------------------|
| p-I $\kappa$ B $\alpha$ (Ser32/36) | Cell Signaling<br>Technology | 9246s             | 1:1000          | Danvers,<br>USA.  |
| I $\kappa$ B $\alpha$              | Cell Signaling<br>Technology | 9242s             | 1:1000          | Danvers,<br>USA.  |
| p-AMPK $\alpha$ (Thr172)           | Cell Signaling<br>Technology | 2531s             | 1:1000          | Danvers,<br>USA.  |
| AMPK $\alpha$                      | Cell Signaling<br>Technology | 2532s             | 1:1000          | Danvers,<br>USA.  |
| $\beta$ -actin                     | TransGen Biotech             | HC201             | 1:1000          | Beijing,<br>China |
| Anti-Rabbit IgG                    | LABLEAD                      | S0101             | 1:2000          | Beijing,<br>China |
| Anti-Mouse IgG                     | LABLEAD                      | S0100             | 1:2000          | Beijing,<br>China |

**Table S2. Primers for qRT-PCR**

| <b>Species</b> | <b>Gene</b>           | <b>Forward primer</b>         | <b>Reverse primer</b>     |
|----------------|-----------------------|-------------------------------|---------------------------|
| <b>Human</b>   | <i>ACTB</i>           | ACTGGGACGACATGGAGAAA          | CTGGATAGCAACGTACATGG      |
|                | <i>CCL22</i>          | GCGTGGTGTGCTAACCTTC           | GAGGTGACCAAGGGTGACAG      |
|                | <i>CCL5</i>           | CCAGCAGTCGTCTTTGTCAC          | CTCTGGGTTGGCACACACTT      |
|                | <i>COX2</i>           | CAATCATTTCCTCCTGTGCCTGATGATTG | GTGCTGGGCAAAGAATGCAA      |
|                | <i>CXCL17</i>         | GATTGGTTCCTGAGAGCCCC          | GGTGCCTTTGGTGTCTTGTTT     |
|                | <i>ICAM1</i>          | GAGCTGTTTGAGAACACCTC          | ATAGGTGACTGTGGGGTTCA      |
|                | <i>IL17A</i>          | ATCTCCACCGCAATGAGGAC          | CTTGCTGGATGGGGACAGAG      |
|                | <i>IL1A</i>           | GGAGCTTGTCAACCCAAACT          | TCCGAAGTCAAGGGGCTAGA      |
|                | <i>IL1B</i>           | AACCTCTTCGAGGCACAAGG          | CATTGCCACTGTAATAAGCCATCA  |
|                | <i>IL6</i>            | GATGAGTACAAAAGTCCTGA          | GCCCATGCTACATTTGCCGA      |
|                | <i>CXCL8</i>          | CTTTCAGAGACAGCAGAGCAC         | GTTCTTTAGCACTCCTTGGC      |
|                | <i>NOS2</i>           | GATAAGTGACATAAGTGACC          | CTGAGGTTGTGATACTGAAG      |
|                | <i>CXCL10</i>         | TCCACGTGTTGAGATCATTGCT        | TGCATCGATTTTGCTCCCCT      |
|                | <i>CCL2</i>           | TAGCAGCCACCTTCATTCCC          | TGCTTGGGGTCAGCACAGAT      |
|                | <i>MMP1</i>           | TTCAACCAGGCCAGGTATT           | TGTCATCCTGAGCTAGCTGA      |
|                | <i>MMP12</i>          | TGGCAAAGGTGGAATCCTAG          | CATTACGGCCTTTGGATCAC      |
|                | <i>MMP2</i>           | AATACCATCGAGACCATGCG          | GATCAGGTGTGTAGCCAATG      |
|                | <i>MMP7</i>           | AGGCATGAGTGAGCTACAGT          | CACATCTGGGCTTCTGCATT      |
| <i>TNFA</i>    | GCGCTC CCAAGAAGA CAGG | GCTGATTAGAGAGAGGTCCC          |                           |
| <b>Mouse</b>   | <i>36b4</i>           | GCCCTGCACTCTCGCTTCT           | CAACTGGGCACCGAGGCAACAGTTG |
|                | <i>Ptgs2</i>          | TGGTGCCTGGTCTGATGATG          | GCAATGCGGTTCTGATACTG      |
|                | <i>Icam1</i>          | TGTGACCAGCCCAAGTTGTT          | TGGAGTCCAGTACACGGTGA      |

|               |                      |                       |
|---------------|----------------------|-----------------------|
| <i>Cxcl1</i>  | ACTCAAGAATGGTCGCGAGG | GTGCCATCAGAGCAGTCTGT  |
| <i>Tgfb1</i>  | GTCACTGGAGTTGTACGGCA | GGGGCTGATCCCGTTGATTT  |
| <i>Il6</i>    | AAAACAATCTGAAACTTCCA | CAGAAGACCAGAGGAAATTT  |
| <i>Il2</i>    | GGAACCTGAAACTCCCCAGG | AATCCAGAACATGCCGCAGA  |
| <i>Ccl2</i>   | ATGCTTCTGGGCCTGCTGTT | CAGCTTCTTTGGGACACCTG  |
| <i>Tgfb2</i>  | CCCCGGAGGTGATTTCCATC | ATGGCATTTCGGAGGGGAG   |
| <i>Cxcl10</i> | ATGACGGGCCAGTGAGAATG | GAGGCTCTCTGCTGTCCATC  |
| <i>Mmp12</i>  | TGATGGCAAAGGTGGTACAC | CCAAGGAATGGCCAAGTTCA  |
| <i>Mmp13</i>  | GGCTCCGAGAAATGCAATCT | CCACTTCAGAATGGGACATA  |
| <i>Ccl5</i>   | GCTGCTTTGCCTACCTCTCC | TCGAGTGACAAACACGACTGC |
| <i>Il1a</i>   | TCCCTCAACCAAATATAT   | ACGGGCTGGTCTTCTCCTTG  |
| <i>Tnfa</i>   | CATCAGTTCTATGGCCAGAC | GGAGTAGACAAGGTACAACCC |
| <i>Mmp2</i>   | CATCGCCCATCATCAAGTTC | ATGGTCTCGATGGTGTCTG   |

---

**Figure S1**

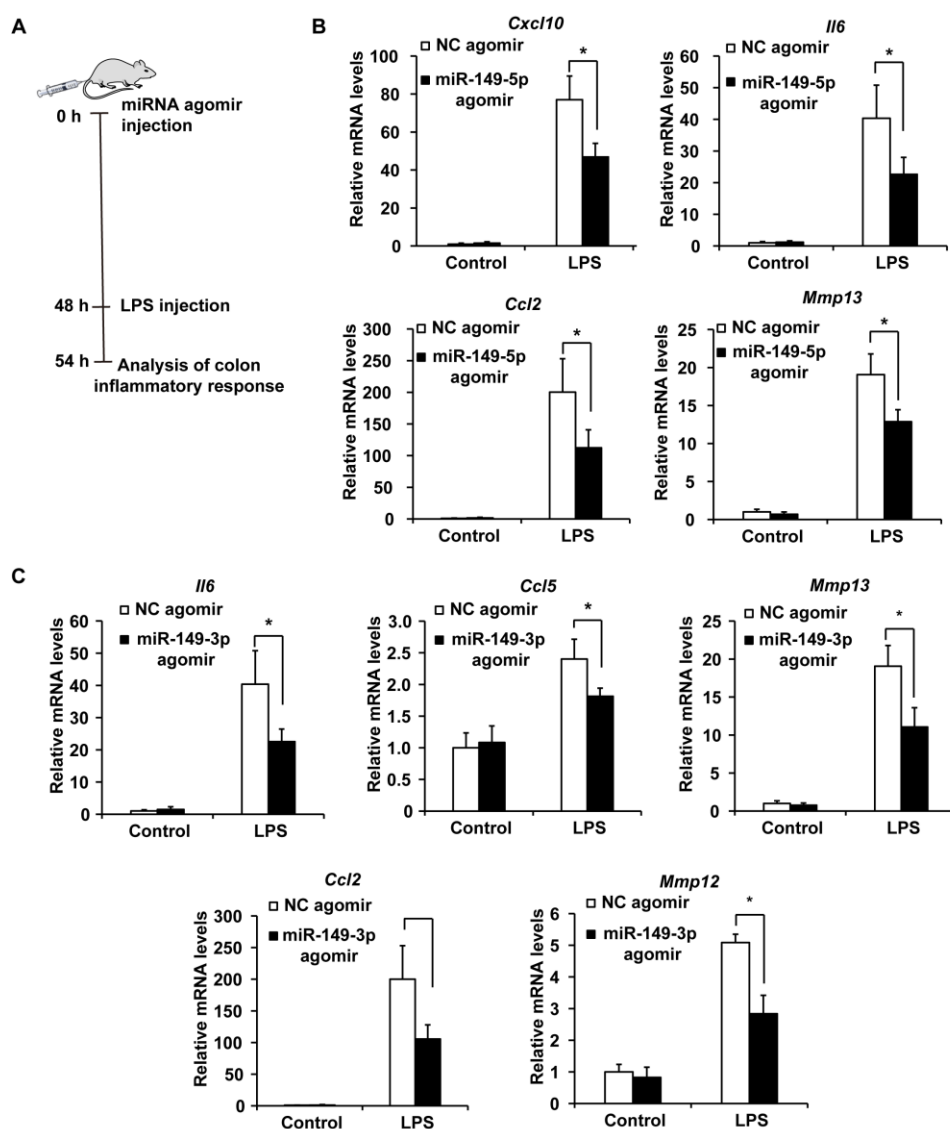

**Figure S1.** miR-149-5p and miR-149-3p regulate LPS-induced colon inflammatory response *in vivo*. (A) Schematic diagram of the experimental process. (B) After LPS administration for 6h, relative mRNA levels of pro-inflammatory genes from pretreated mouse colon with miRNA negative control and miR-149-5p agomirs ( $n=6$ ). (C) miR-149-3p agomirs repressed LPS-induced inflammatory gene levels in mouse colon tissues ( $n = 6$ ).  $*P < 0.05$ .

Figure S2

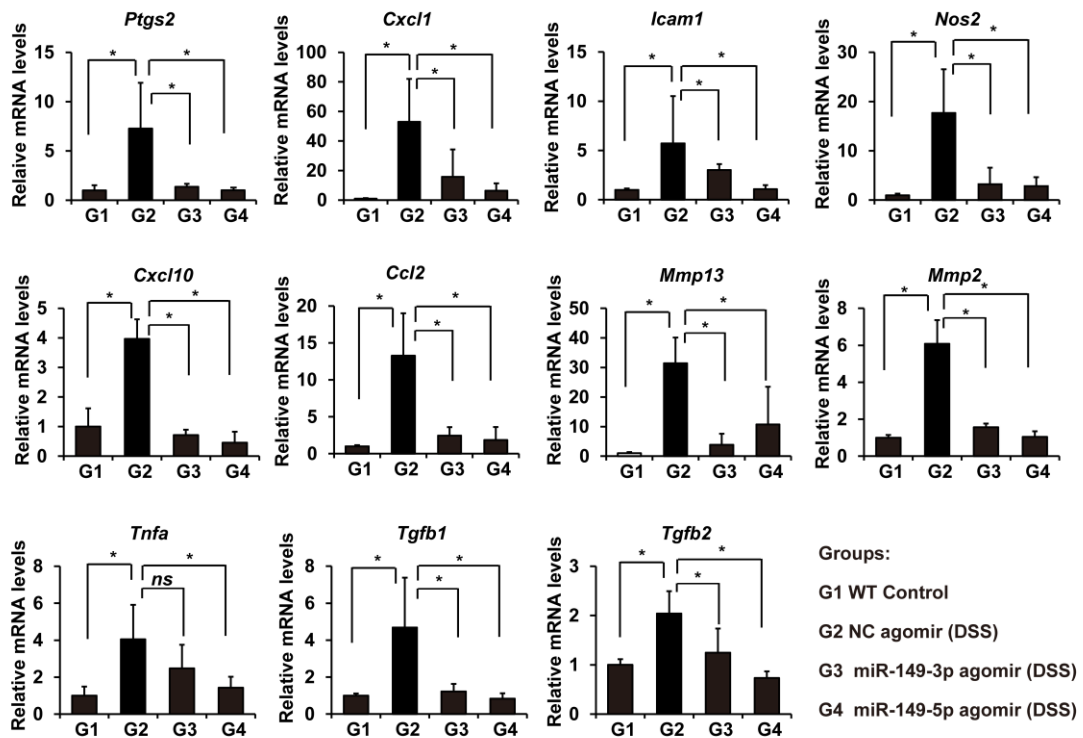

Figure S2. miR-149-5p and miR-149-3p agomirs regulate DSS-induced proinflammatory genes in mouse colons ( $n = 5$ ),  $*P < 0.05$ ; *ns*, no significant difference.

**Figure S3.**

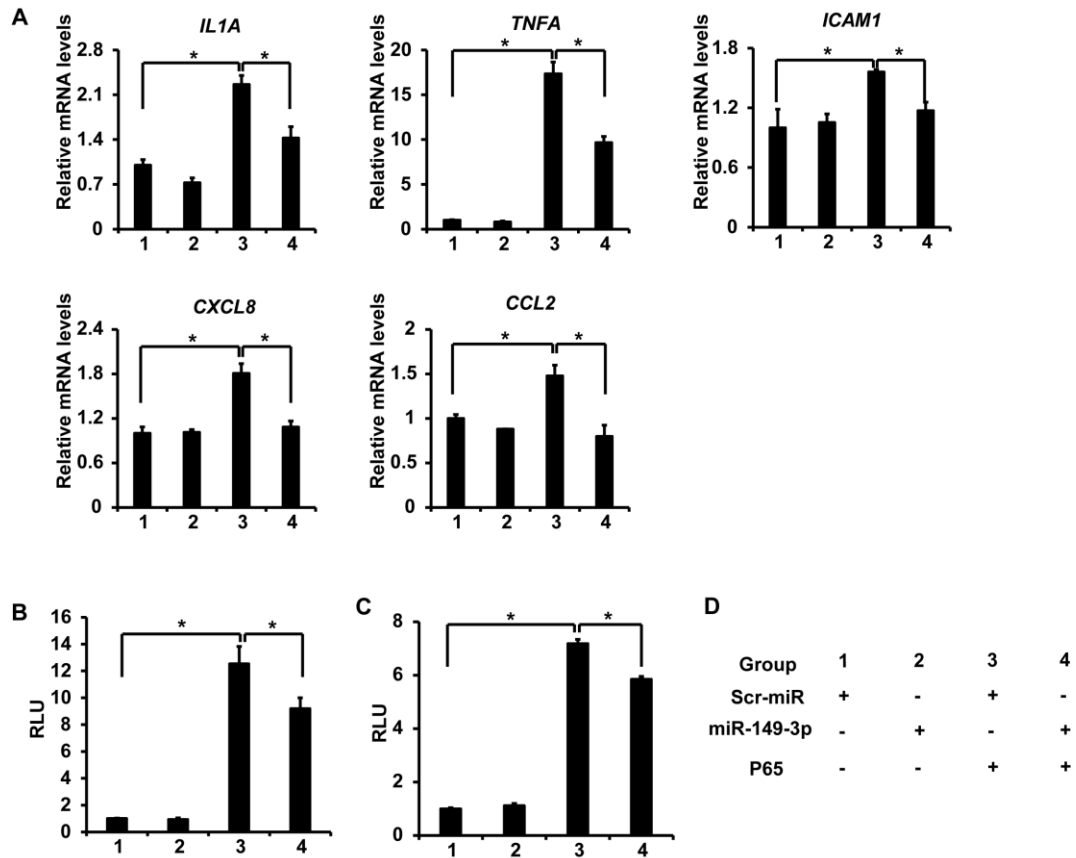

**Figure S3.** miR-149-3p antagonized NF- $\kappa$ B cell signaling pathway induced by p65 overexpression in colon adenocarcinoma cells. (A) Relative mRNA levels of NF- $\kappa$ B-mediated inflammatory cytokines induced by p65 overexpression are reduced upon miR-149-3p mimics in Caco2 cells (n=3). (B-C) miR-149-3p mimics lessened the luciferase signal of NF- $\kappa$ B activity induced by p65 overexpression in Caco2 (B) and SW480 cells (C) (n=3). RLU, relative luciferase units. (D) Group information. \* $P < 0.05$ .

**Figure S4.**

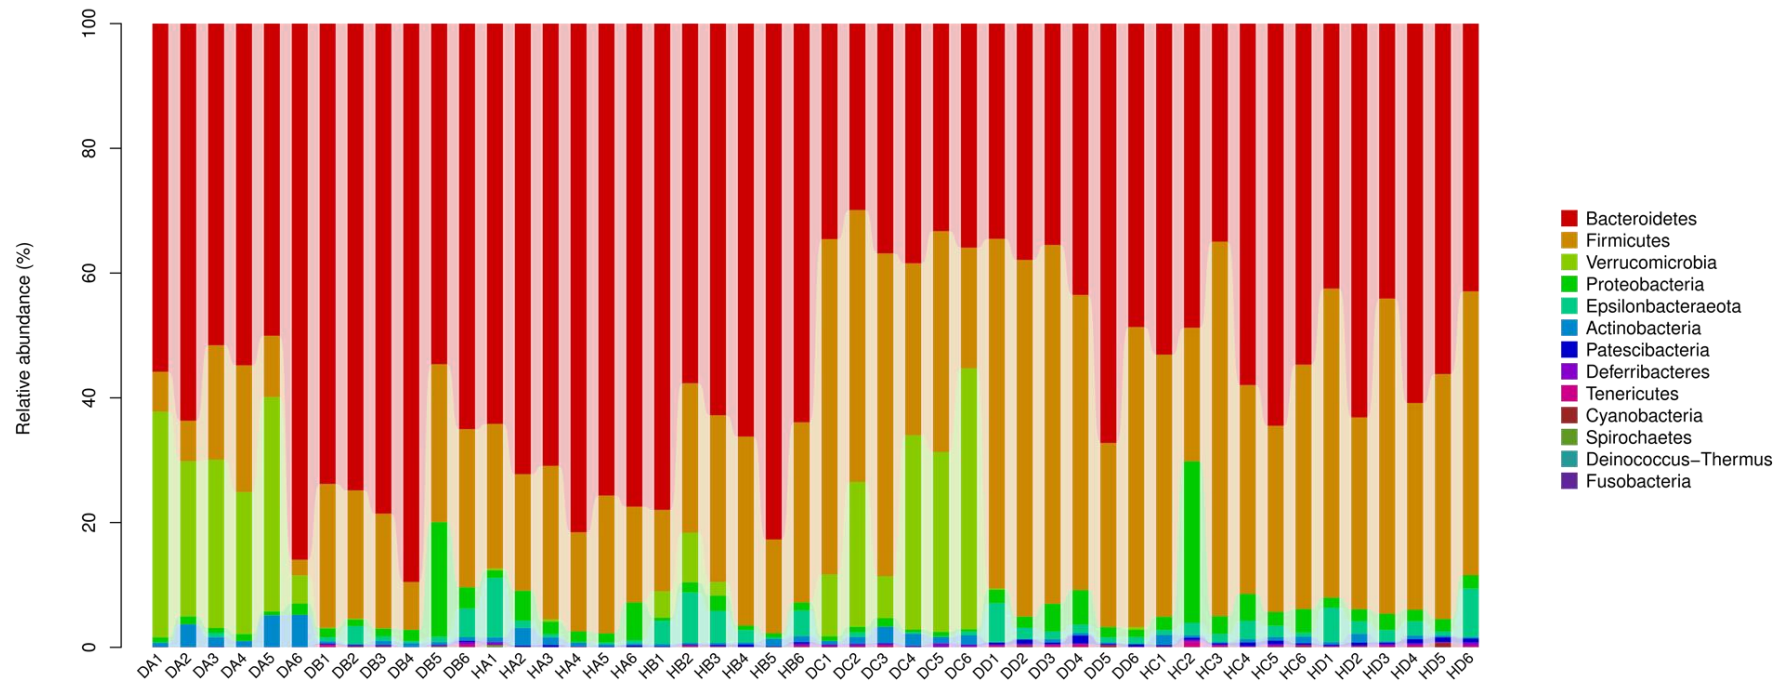

**Figure S4.** Fecal microbiota taxa analysis from WT and miR-149<sup>\*-/</sup> mice at phylum. To allow natural transfer of the microbiota, WT and miR-149<sup>\*-/</sup> males at 4-weeks were co-housed. As a control, single type control group was fed at the same conditions when the mice reached 8 weeks, then 2% of DSS was given for 7 days, fecal microbiota were analyzed based on 16S RNA sequencing (n=6). DA1-DA6, WT control group (WT), DB1-DB6, miR-149<sup>\*-/</sup> control group (KO), HA1-HA6, WT mice co-housed with miR-149<sup>\*-/</sup> mice (CH-WT), HB1-HB6, miR-149<sup>\*-/</sup> mice co-housed with WT mice (CH-KO), DC1-DC6, DSS treated WT



control group (WT (DSS)), DD1-DD6, DSS-treated miR-149\*<sup>-/-</sup> control group (WT (DSS)), HC1-HC6, DSS-treated CH-WT group (CH-WT (DSS)), HD1-HD6, DSS-treated CH-KO group (CH-KO (DSS)).

Figure S5.

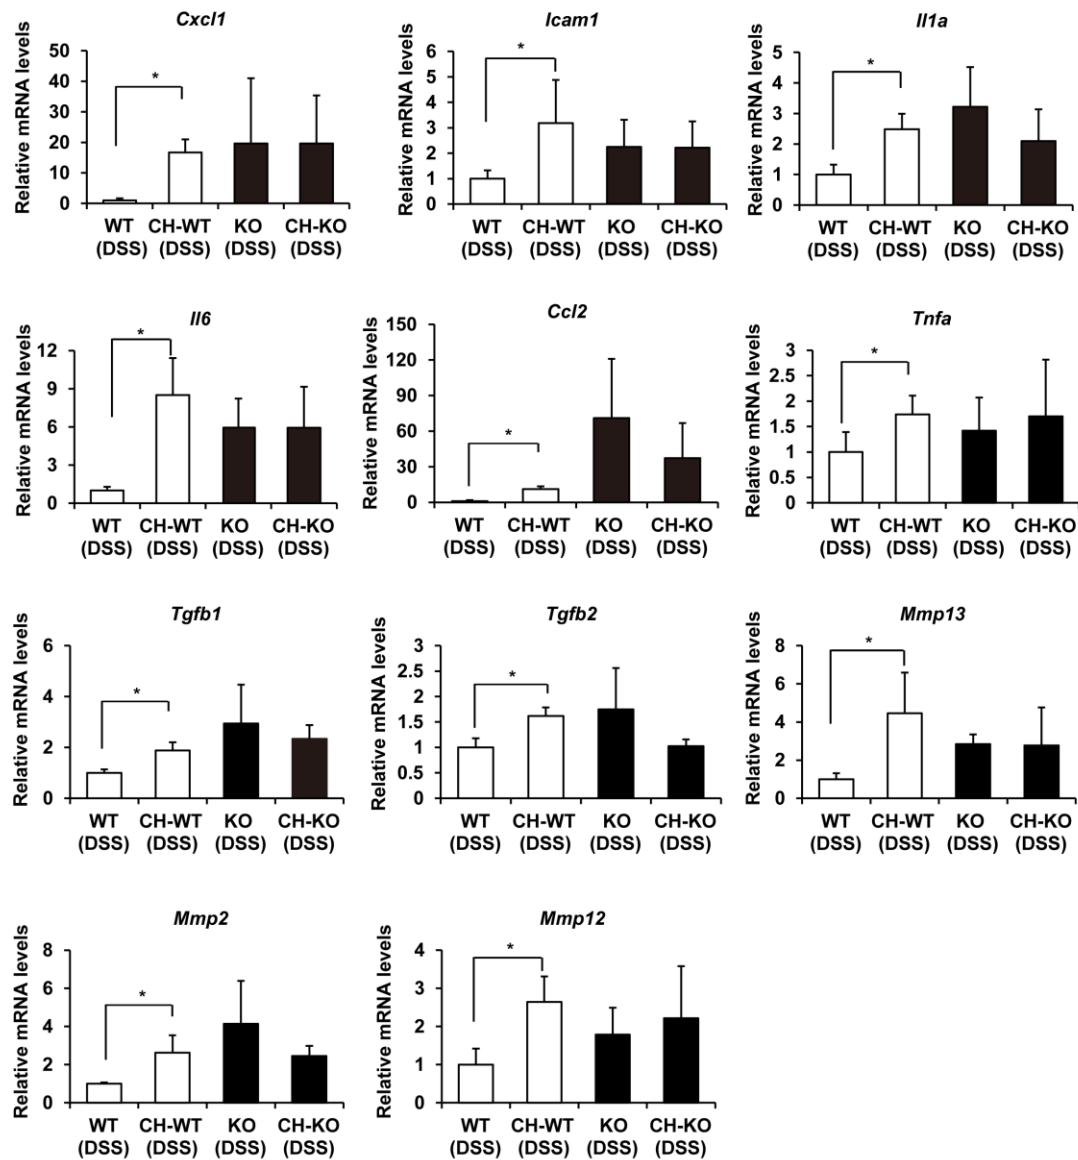

Figure S5. Relative mRNA levels of inflammatory cytokines induced by DSS administration are increased in CH-WT mice (n= 5). \* $P < 0.05$ .
